# Supplementary material for: La mira espejeante de Tarkovski
Source: Royal Society of Chemistry journal article supplement (doi:10.1039/d2an01162j), 2011-01-01
Supplement: d2an01162j1.pdf [file d2an01162j1.pdf]

## Electronic supplementary information (ESI)

# **Mass spectrometry-based quantitation combined with time-dependent metabolomics to discover metabolic features in human neurogenesis using neural constructs generated from neural progenitor cells**

Xin Wang,\* Zhenye Gao and Wenxiu Zhou

School of Pharmacy, Shanghai Jiao Tong University, 800 Dongchuan Road, Shanghai  
200240, P. R. China

\*Corresponding Author E-mail: [xinwang2020@sjtu.edu.cn](mailto:xinwang2020@sjtu.edu.cn)

### **Table of Contents**

#### 1. Human neural constructs

**Fig. S1** Schematic representation and immunofluorescence images. Page S-2

#### 2. NAA and NAG quantitation

**Fig. S2** The typical MRM chromatograms of NAA, NAG and NAA-D3. Page S-3

**Table S1** Optimized MRM parameters for NAA and NAG quantitation. Page S-4

**Table S2** The precisions and recoveries for the measurements of NAA and NAG. Page S-4

#### 3. Time-dependent metabolomic study during neurodevelopment

**Fig. S3** Typical total-ion chromatograms of day 18 and day 0 (control) samples. Page S-5

**Fig. S4** Separation of day 18 and day 0 (control) samples by PCA. Page S-5

**Table S3** Metabolite profiling results of time-dependent metabolomics. Page S-6

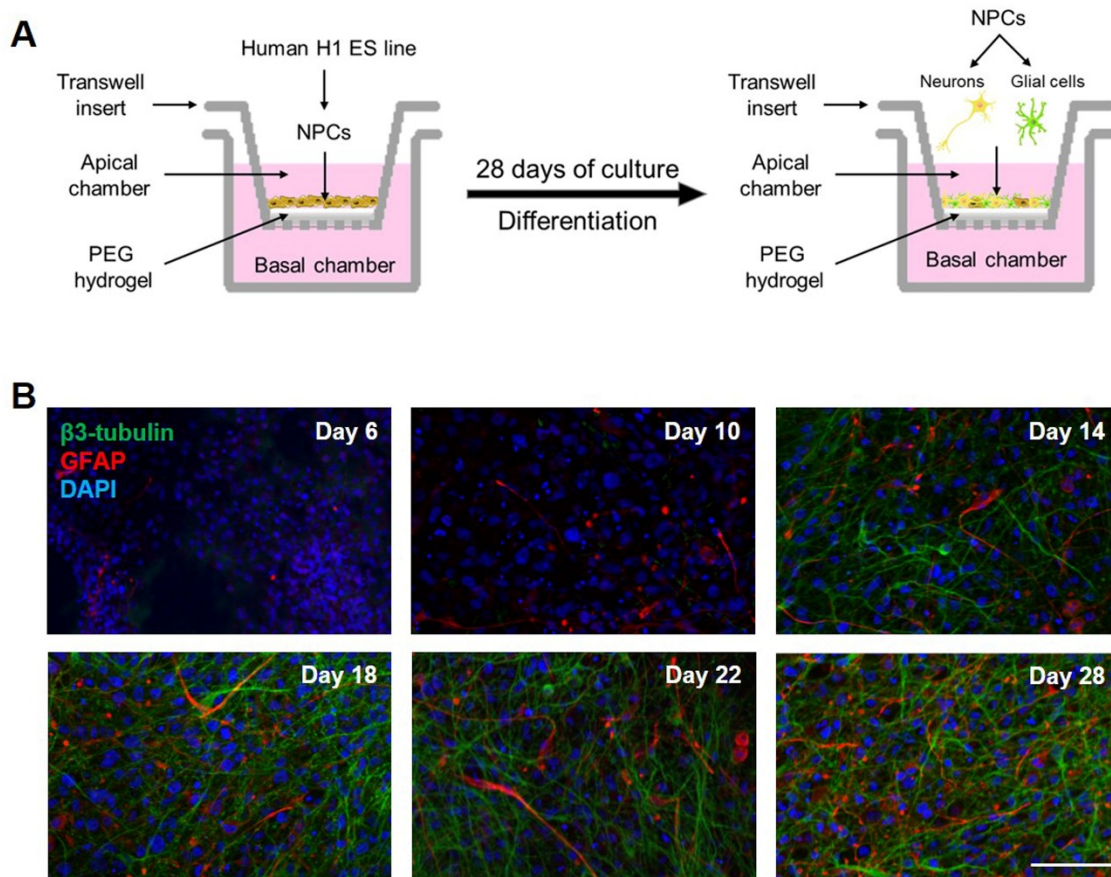

**Fig. S1** (A) Schematic representation of the human neural constructs generated from neural progenitor cells; (B) representative immunofluorescence images illustrating  $\beta$ 3-tubulin (neurons, green), GFAP (glial cells, red), and DAPI (nuclei, blue) expression for neural constructs after 6 days, 10 days, 14 days, 18 days, 22 days and 28 days of culture on PEG hydrogels (Scale bar: 50  $\mu$ m).

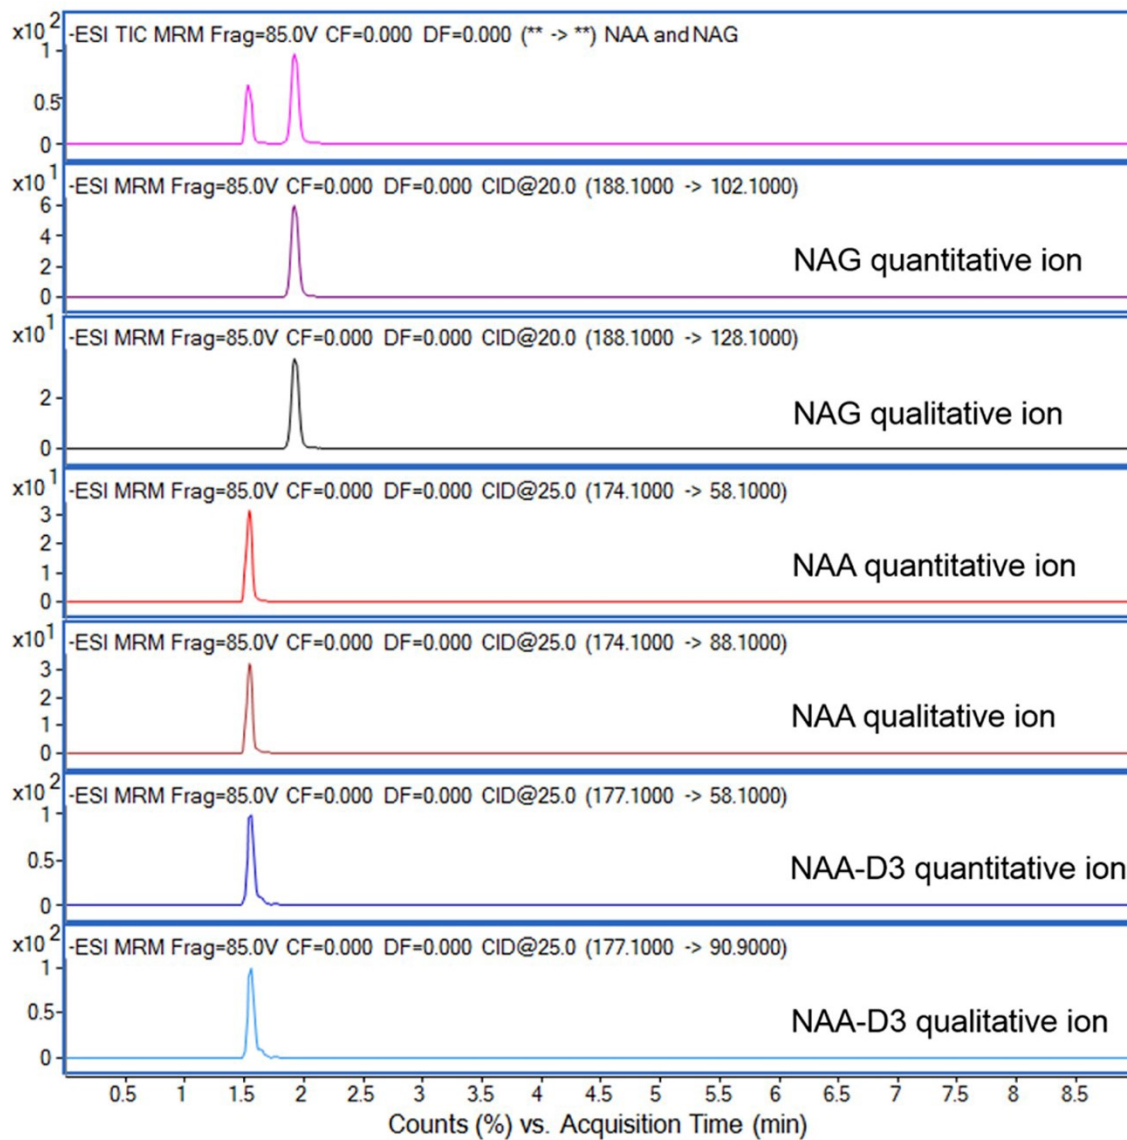

**Fig. S2** The typical MRM chromatograms of NAA, NAG and NAA-D3. The transitions of  $m/z$  188.1→102.1 and  $m/z$  174.1→58.1 were used for the quantitation of NAG and NAA, respectively; the ions at  $m/z$  128.1 and  $m/z$  88.1 were selected as qualitative ions for NAG and NAA. NAA-D3 was employed as the internal standard for quantitation.

**Table S1** Optimized MRM parameters for NAA and NAG quantitation by using LC-QqQ MS

| Analyte     | Quantitation                 |                            |                  | Confirmation                 |                            |                  |
|-------------|------------------------------|----------------------------|------------------|------------------------------|----------------------------|------------------|
|             | Precursor ion ( <i>m/z</i> ) | Product ion ( <i>m/z</i> ) | Collision energy | Precursor ion ( <i>m/z</i> ) | Product ion ( <i>m/z</i> ) | Collision energy |
| NAA         | 174.1                        | 58.1                       | 25 V             | 174.1                        | 88.1                       | 25 V             |
| NAG         | 188.1                        | 102.1                      | 20 V             | 188.1                        | 128.1                      | 20 V             |
| NAA-D3 (IS) | 177.1                        | 58.1                       | 25 V             | 177.1                        | 90.9                       | 25 V             |

**Table S2** The precisions and recoveries for the measurements of NAA and NAG in blank medium by LC-MS/MRM method

| Analyte | Intra-day precision<br>RSD (% , n=5) |          |           | Inter-day precision<br>RSD (% , n=5) |          |           | Recovery (% , n=3) |          |           |
|---------|--------------------------------------|----------|-----------|--------------------------------------|----------|-----------|--------------------|----------|-----------|
|         | Low                                  | Medium   | High      | Low                                  | Medium   | High      | Low                | Medium   | High      |
| NAA     | (10 nM)                              | (100 nM) | (1000 nM) | (10 nM)                              | (100 nM) | (1000 nM) | (10 nM)            | (100 nM) | (1000 nM) |
|         | 8.8                                  | 3.1      | 3.5       | 9.7                                  | 6.9      | 7.9       | 88.8               | 92.9     | 101.0     |
| NAG     | (2 nM)                               | (20 nM)  | (200 nM)  | (2 nM)                               | (20 nM)  | (200 nM)  | (2 nM)             | (20 nM)  | (200 nM)  |
|         | 11.4                                 | 8.9      | 3.0       | 12.6                                 | 8.0      | 9.3       | 103.1              | 104.5    | 95.6      |

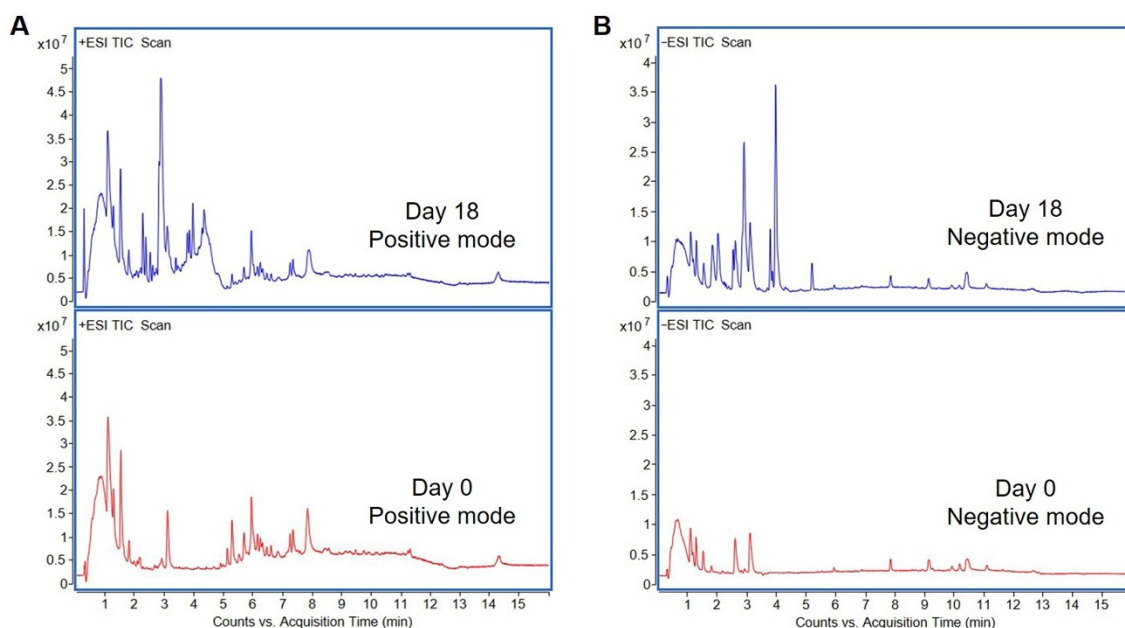

**Fig. S3** Typical LC-MS total-ion chromatograms of day 18 and day 0 (control) samples acquired in both positive (A) and negative (B) ion modes.

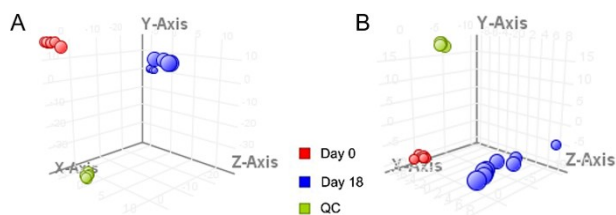

**Fig. S4** PCA plots of day 0 (red), day 18 (blue), and QC (green) samples under both positive (A) and negative (B) modes, with the first three principal components accounting for 91.2% (A) and 87.9% (B) of the variance in analysis. Each dot represents a sample and each color represents the type of the sample.

**Table S3** Metabolite profiling and comparison between the sample groups (day 10, day 18, day 28) and control group (day 0) (Fold change > 1.5,  $p < 0.05$ )

| Ionization mode     | Samples         | Total features | Total significantly changed features | Total increased features | Total decreased features |
|---------------------|-----------------|----------------|--------------------------------------|--------------------------|--------------------------|
| LC-ESI <sup>+</sup> | Day 10 vs Day 0 | 13803          | 2483                                 | 1829                     | 654                      |
|                     | Day 18 vs Day 0 | 15732          | 3929                                 | 3344                     | 585                      |
|                     | Day 28 vs Day 0 | 15850          | 4224                                 | 3639                     | 585                      |
| LC-ESI <sup>-</sup> | Day 10 vs Day 0 | 858            | 342                                  | 317                      | 25                       |
|                     | Day 18 vs Day 0 | 865            | 320                                  | 278                      | 42                       |
|                     | Day 28 vs Day 0 | 852            | 333                                  | 280                      | 53                       |
